# Supplementary material
Source: PubMed Central journal article supplement (PMC4689630)
Supplement: NIHMS737647-supplement.pdf [file NIHMS737647-supplement.pdf]

## Data Supplement for:

### Connective Tissue Growth Factor Regulates Cardiac Function and Fibrosis in a Transgenic Mouse Model of Dilated Cardiomyopathy

#### SUPPLEMENTAL METHODS

*Materials and reagents.* Real-time qPCR reagents were obtained from GE Healthcare Biosciences (Piscataway, NJ), and Invitrogen (Grand Island, NY). cDNA primers used in genotyping were obtained from Integrated DNA Technologies, Inc. (Coralville, IA). PKC $\epsilon$  monoclonal antibody (mAb) was obtained from BD Biosciences (Cat #610085; San Jose, CA). GAPDH mAb was from Novus Biologicals (Cat #NB300-221; Littleton, CO). CTGF mAb was obtained from Santa Cruz Biotechnology (Cat #sc-101586; Santa Cruz, CA). Phospho-specific cMyBP-C Ser302 and total cMyBP-C polyclonal antibodies (pAb) were a kind gift from Dr. Sakthivel Sadayappan (Loyola University Chicago, Maywood, IL). Phospho-specific cTnI Thr143 (Cat #ab58546) and total cTnI mAb (Cat #ab47003) were from Abcam Cambridge, MA). Horseradish peroxidase-conjugated goat anti-rabbit (Cat #1706515) and goat anti-mouse (Cat #1721011) IgG were obtained from Bio-Rad (Hercules, CA). All other reagents were of the highest grade commercially available and were obtained from Sigma, and Baxter S/P (McGaw Park, IL).

*Echocardiography.* Transthoracic M-mode and 2D echocardiography was performed on anesthetized mice using an Acuson 15L8 Microson High-Resolution Transducer and Acuson Sequoia C256 Echocardiography System (Siemens Medical Solutions; Malvern, PA). Anesthesia was induced in a closed container with isoflurane (5% in O<sub>2</sub>) and maintained with 2% isoflurane by nosecone delivery. Temperature was maintained by placing animals in the supine position on a 37°C heated table. Parasternal long- and short-axis images at the level of the papillary muscles were analyzed in real-time or saved on 230Mb magneto-optical discs for off-line analysis. Interventricular septal thickness, LV posterior wall thickness, and LV internal dimension were measured at the end of diastole (d) and systole at maximum sweep speed. LV fractional shortening (FS, %) was calculated from digital images as ((LV end-diastolic dimension – LV end-systolic dimension) / LV end-diastolic dimension) x 10<sup>2</sup>. End-systolic, end-diastolic, and stroke volumes (LVESV, LVEDV, and LVSV in  $\mu$ L, respectively) were estimated using the spherical formula. LV ejection fraction (EF, %) was calculated as (LVSV / LVEDV) x 10<sup>2</sup>. LV mass (mg) was calculated as LV tissue volume (mm<sup>3</sup>) x 1.04. LV Relative Wall Thickness was calculated as 2 x (LV PW thickness,d / LV internal dimension,d). Left atrial area (mm<sup>2</sup>) was measured using the tracing function from the parasternal long-axis image. LV Remodeling Index (LVRI, mg/ $\mu$ L) was calculated as the ratio of LV mass to LV volume.

*LV catheterization.* LV catheterization was performed on anesthetized mice using a 1.4F Millar Pressure-Volume Catheter (SPR-839, Millar Instruments, Houston, TX) connected to an MPVS-300 System and interfaced to a PowerLab 8/35 High-Performance Data Acquisition System (ADInstruments, Colorado Springs, CO). A neck cut-down was performed under general anesthesia and an 18g catheter was inserted into the trachea, which was connected to a Harvard Model 687 mouse ventilator set to deliver ~200 $\mu$ l tidal volume at 145 respirations per min. A midline incision just below the diaphragm was used to expose the LV apex, which was punctured with a 30g needle in order to introduce the conductance catheter under direct visualization. Pressure and volume measurements were acquired and analyzed using PVAN software.

*Detailed mRNA expression analysis methods.* Total RNA was isolated from frozen LV tissue using TRIzol Reagent (Life Technologies, Carlsbad, CA) and purified on RNeasy Mini Spin Columns (Qiagen, Valencia, CA) with on-column DNase digestion to remove residual genomic DNA. RNA quantity and quality were assessed using an ND-1000 spectrophotometer (NanoDrop Technologies, Wilmington, DE) and 2100 Bioanalyzer (Agilent Technologies, Palo Alto, CA), with all samples having optical density ( $OD_{260/280}$ ) ratios  $\geq 1.9$  and RNA integrity (RIN) values  $\geq 6.7$ .

For quantitative RT-PCR analyses, cDNA was prepared from 2  $\mu$ g of total RNA using SuperScript Reverse Transcriptase (Invitrogen) or the High Capacity cDNA Reverse Transcription Kit (Life Technologies). In some quantitative PCR reactions, samples were run in triplicate on an ABI 7300 Real-Time PCR System (Applied Biosystems, Foster City, CA), using TaqMan® assays for Col1a1 (Mm00801666\_g1), Col3a1 (Mm01254476\_m1), Ctgf (Mm01192933\_g1), and eukaryotic 18S ribosomal RNA (4352930E). In other experiments, samples were analyzed in triplicate on a 7900HT Fast Real-Time PCR System using PerfeCTa qPCR FastMix with UNG and ROX (VWR, Visalia, CA) or Platinum Quantitative PCR SuperMix-UDG (Life Technologies) with TaqMan® assays for 18S ribosomal RNA (4319413E), Actb (4352341E), Col1a1 (Mm00801666\_g1), Col1a2 (Mm00483888\_m1), Col3a1 (Mm01254476\_m1), Col5a2 (Mm00483675\_m1), Ctgf (Mm00515790\_g1), Fbn1 (Mm00514908\_m1), Lox (Mm00495386\_m1), Ltbp2 (Mm01307379\_m1), Mfap5 (Mm00489404\_m1), Postn (Mm00450111\_m1), Serpine2 (Mm00436753\_m1), Tgfb3 (Mm00436960\_m1) or Timp1 (Mm00441818\_m1). Actb- or 18S rRNA-normalized mRNA concentrations were calculated using the  $\Delta$ CT for the median of technical triplicate cycle-threshold intercepts (CT's) from target and endogenous control genes.

For microarray expression profiling, biotinylated cRNA were prepared from 250ng of purified total RNA using the GeneChip 3'IVT Express Kit (Affymetrix, Santa Clara, CA) according the manufacturer's standard protocol. Following fragmentation, labeled cRNA were hybridized on Affymetrix Mouse Genome 430A 2.0 microarrays using the Affymetrix GeneChip Hybridization, Wash, and Stain Kit and standard protocol. Hybridization was performed for 16h at 45°C, 60rpm in an Affymetrix GeneChip Hybridization Oven 640 and staining and washing were performed using an Affymetrix GeneChip Fluidics Station 450 using recommended fluidics script FS450\_0002. GeneChips were scanned in an Affymetrix GeneChip Scanner 7G using AGCC software and resulting CEL files were exported to GCOS v1.4.0.036 to generate CEL files compatible with Agilent GeneSpring GX 7.3.1 analysis software. CEL data were preprocessed using the GC content-based Robust Multi-Array (GCRMA) algorithm and imported into GeneSpring GX 7.3.1. GCRMA-processed, median-normalized data and raw CEL files are available at <http://www.ncbi.nlm.nih.gov/geo/query/acc.cgi?acc=GSE68857>. Low intensity probesets with mean raw fluorescence values  $\leq 50$  in all groups were filtered from further analysis. Between-group gene expression comparisons were performed on median per-gene normalized data using parametric t-tests without assuming equal variances or correcting for multiple comparisons. FG-3149-responsive cardiac injury genes were defined as genes with a >2-fold difference in expression in IgG-treated PKC $\epsilon$  mice vs. IgG-treated FVB mice at  $P < 0.05$  that were also resolved >1.5-fold at  $P < 0.05$  in FG-3149-treated vs. IgG-treated PKC $\epsilon$  mice.

# SUPPLEMENTAL RESULTS

## Online Figure I

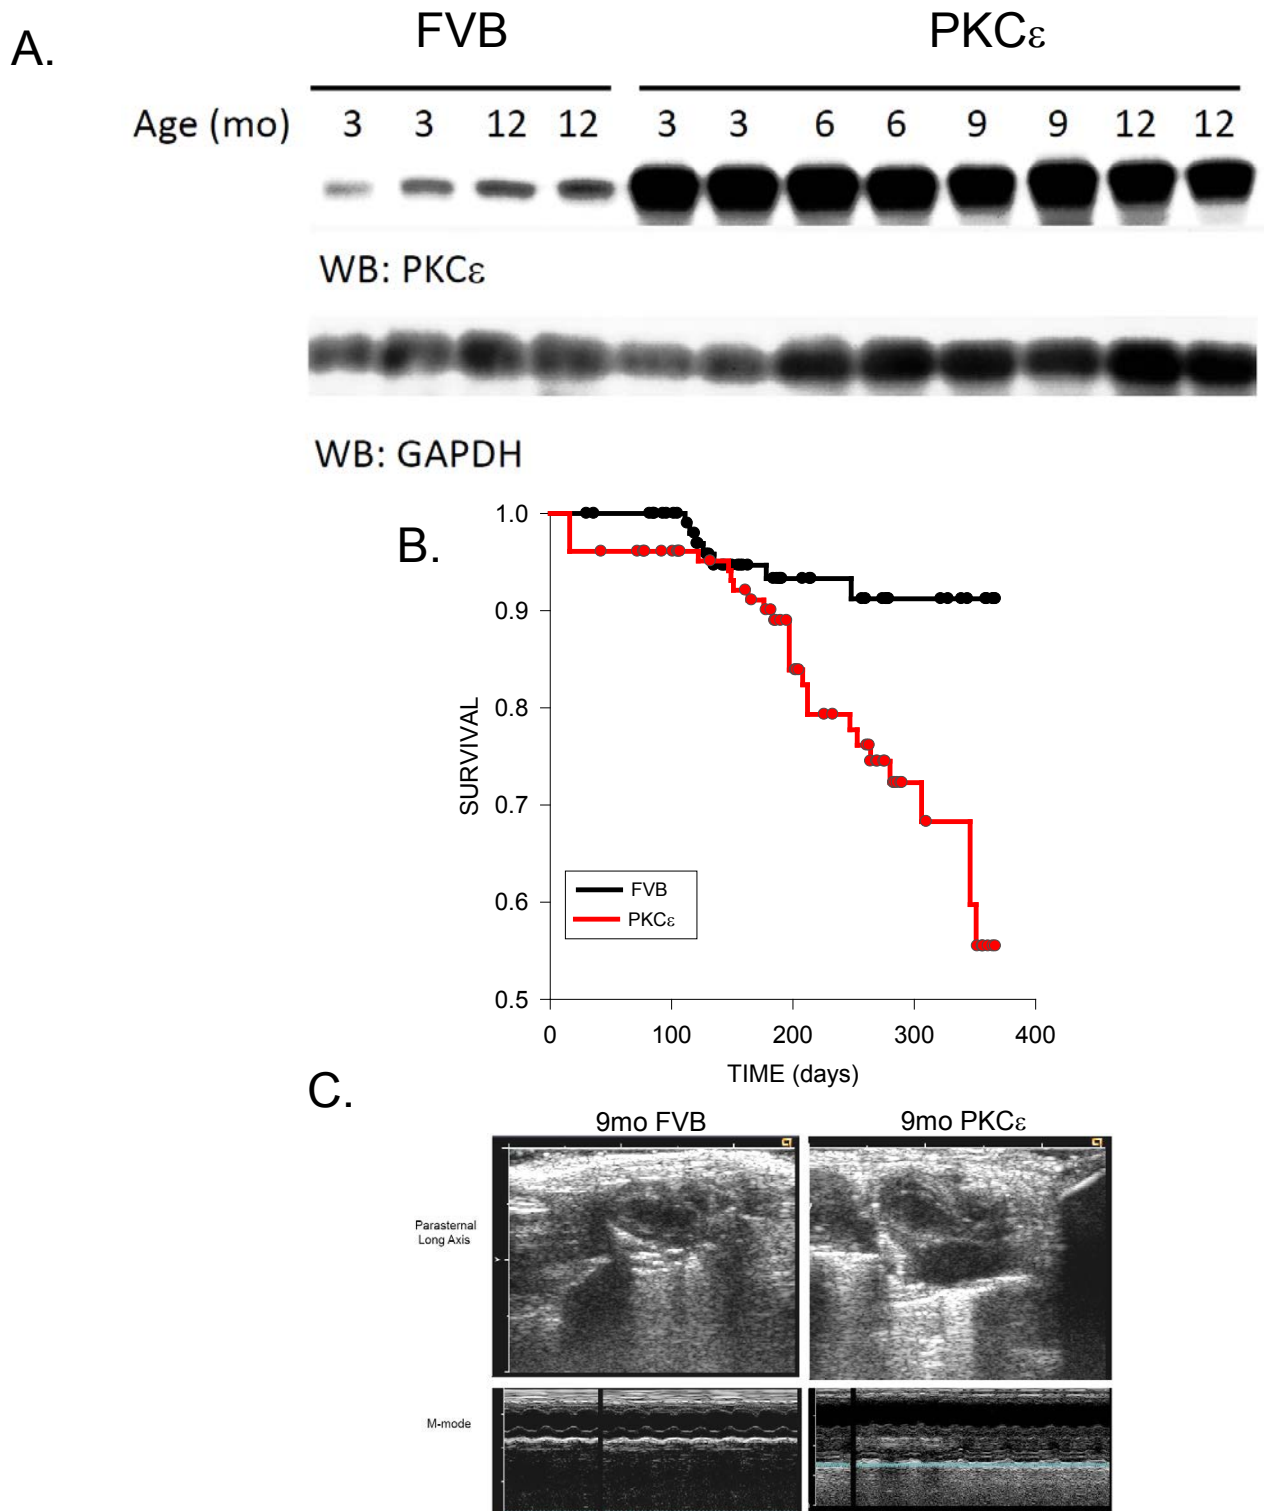

**Online Figure I.** *PKC $\epsilon$  mice have a dilated cardiomyopathy with increased mortality.* (A) Western blot of LV tissue extracts (50 $\mu$ g of total protein per lane) from FVB and PKC $\epsilon$  mice of varying ages (3-12mo). (B) Kaplan-Meier survival curves for FVB (n=131) and PKC $\epsilon$  (n=128) mice. Nontransgenic FVB mice had a mean survival time of 349 $\pm$ 7 days, whereas PKC $\epsilon$  transgenic mice mean survival time was 310 $\pm$ 10 days ( $P$ <0.001; Log-Rank Test). Most deaths occurred suddenly and unexpectedly. (C) Representative M-mode and 2-D echocardiograms of 9mo FVB and PKC $\epsilon$  mice demonstrated that PKC $\epsilon$  mice have a dilated cardiomyopathy with all 4 chambers affected.

A.

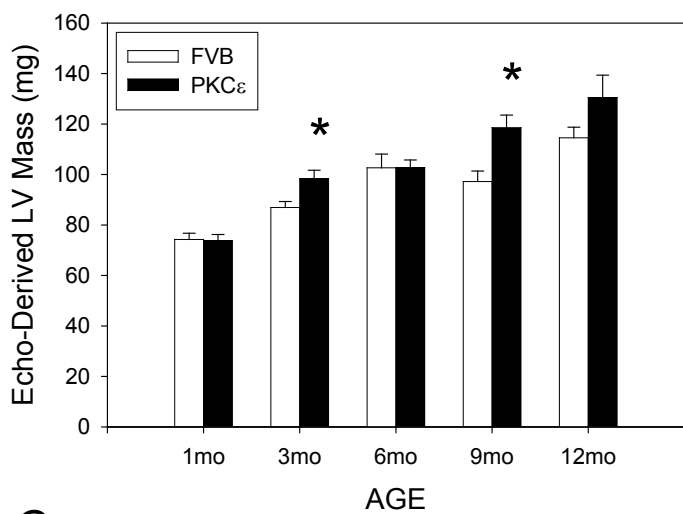

B.

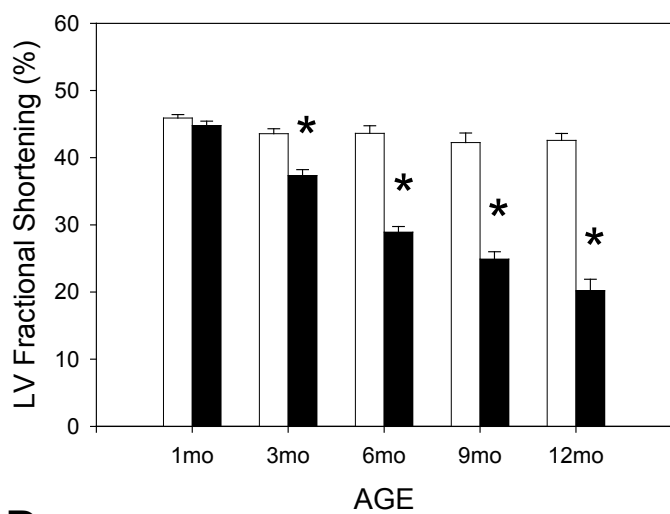

C.

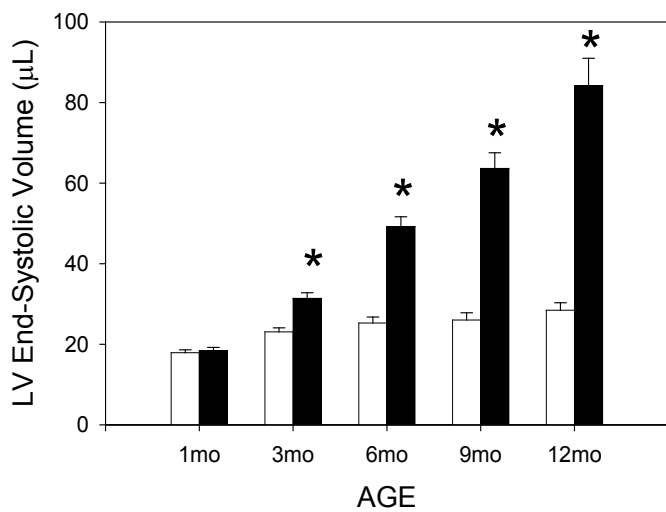

D.

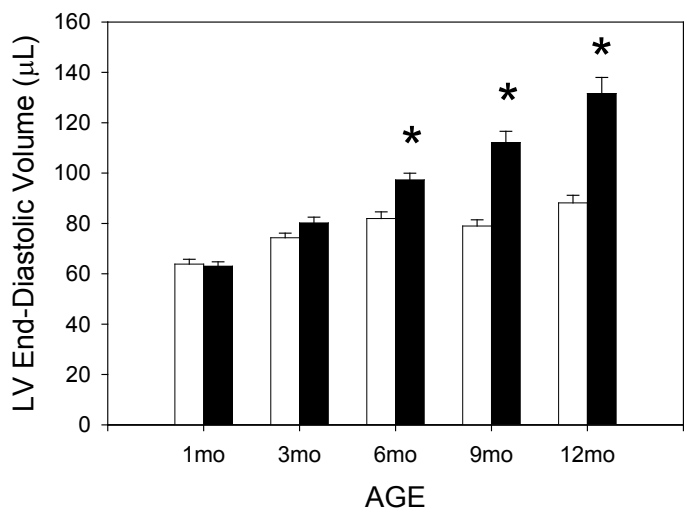

E.

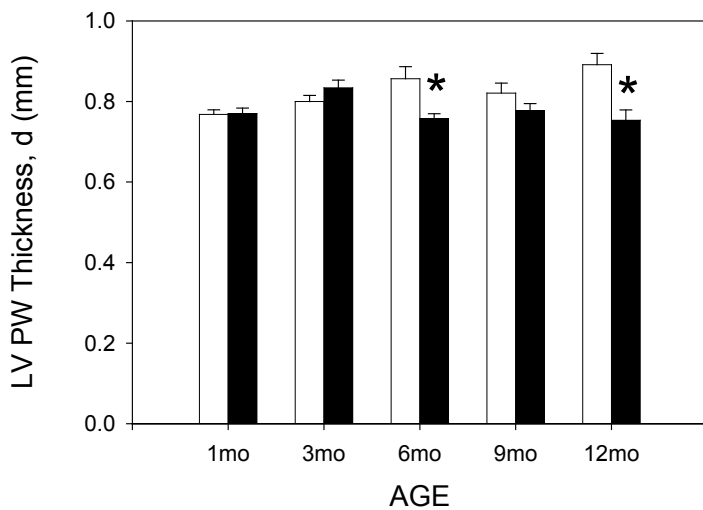

F.

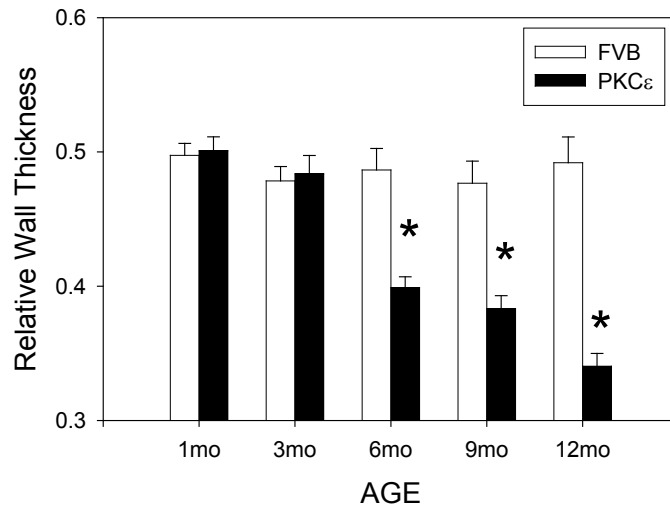

G.

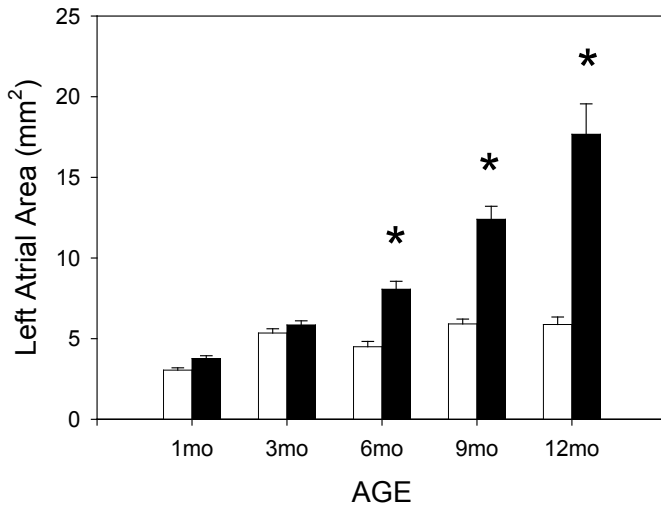

H.

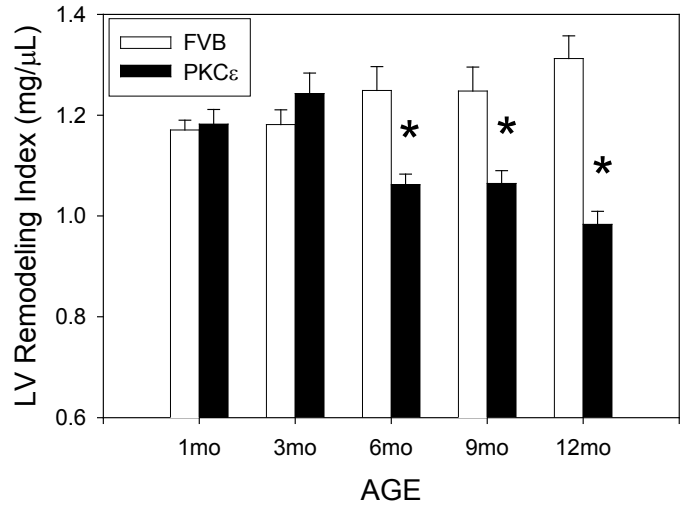

**Online Figure II.** *PKC $\epsilon$  mice develop a dilated cardiomyopathy with LV systolic and diastolic dysfunction.* Serial M-mode and 2D echocardiography were used to assess the age at which LV dysfunction developed in PKC $\epsilon$  mice. (A) Echo-derived LV mass was similar in PKC $\epsilon$  and FVB mice at 1 month and modestly increased at 3 months of age, indicating that this level of PKC $\epsilon$  over-expression produced only mild LV hypertrophy. (B) PKC $\epsilon$  expression significantly reduced LV FS beginning at 3 months of age. (C) The reduced FS was initially the result of increased LV end-systolic dimension and LVESV, suggesting a primary defect in contractility. (D) Thereafter, LV end-diastolic dimension and LVEDV increased, (E) together with a small decrease in LV posterior wall (PW) thickness, (F) along with a much larger decrease in relative wall thickness as the chamber dilated. (G) By 12 months of age, surviving PKC $\epsilon$  mice demonstrated a profoundly increased left atrial area, and (H) a substantial decrease in LVRI. \* $P < 0.05$  for FVB vs. PKC $\epsilon$  by 2-way ANOVA followed by Holm-Sidak test.

**Online Table I. Systolic and Diastolic Function in FVB and PKC $\epsilon$  Mice**

| Parameter                                         | 3 mo             |                  | 6 mo            |                  | 9 mo            |                  | 12 mo           |                  |
|---------------------------------------------------|------------------|------------------|-----------------|------------------|-----------------|------------------|-----------------|------------------|
|                                                   | FVB              | PKC $\epsilon$   | FVB             | PKC $\epsilon$   | FVB             | PKC $\epsilon$   | FVB             | PKC $\epsilon$   |
| n=                                                | 12               | 7                | 17              | 19               | 9               | 28               | 14              | 10               |
| Heart Rate (bpm)                                  | 578 $\pm$ 9      | 528 $\pm$ 27     | 516 $\pm$ 8     | 484 $\pm$ 13     | 510 $\pm$ 15    | 456 $\pm$ 12*    | 525 $\pm$ 22    | 411 $\pm$ 27*    |
| +dP/dt <sub>max</sub> (mmHg x sec <sup>-1</sup> ) | 11923 $\pm$ 586  | 8138 $\pm$ 1051* | 11595 $\pm$ 742 | 6192 $\pm$ 534*  | 10517 $\pm$ 815 | 5624 $\pm$ 292*  | 10548 $\pm$ 815 | 5306 $\pm$ 725*  |
| Contractility Index (sec <sup>-1</sup> )          | 169 $\pm$ 9      | 132 $\pm$ 11*    | 147 $\pm$ 4     | 97 $\pm$ 4*      | 158 $\pm$ 7     | 90 $\pm$ 3*      | 151 $\pm$ 5     | 88 $\pm$ 6*      |
| -dP/dt <sub>max</sub> (mmHg x sec <sup>-1</sup> ) | -9262 $\pm$ 1028 | -6894 $\pm$ 729* | -8477 $\pm$ 636 | -5070 $\pm$ 395* | -7380 $\pm$ 695 | -4318 $\pm$ 301* | -7360 $\pm$ 610 | -3988 $\pm$ 434* |
| Tau (msec <sup>-1</sup> )                         | 6.1 $\pm$ 0.2    | 9.9 $\pm$ 2.2    | 7.1 $\pm$ 0.8   | 12.8 $\pm$ 0.8*  | 7.4 $\pm$ 0.7   | 15.3 $\pm$ 1.2*  | 7.5 $\pm$ 0.5   | 14.2 $\pm$ 1.3*  |
| Maximum Systolic Pressure (mmHg)                  | 114 $\pm$ 14     | 91 $\pm$ 3       | 129 $\pm$ 8     | 98 $\pm$ 6*      | 112 $\pm$ 10    | 93 $\pm$ 4       | 108 $\pm$ 5     | 88 $\pm$ 7       |
| End-diastolic Pressure (mmHg)                     | 2 $\pm$ 1        | 6 $\pm$ 1        | 3 $\pm$ 2       | 10 $\pm$ 2*      | 4 $\pm$ 1       | 11 $\pm$ 1*      | 4 $\pm$ 1       | 12 $\pm$ 3*      |
| End-diastolic volume ( $\mu$ l)                   | 56 $\pm$ 9       | 45 $\pm$ 5       | 54 $\pm$ 4      | 73 $\pm$ 3*      | 48 $\pm$ 3      | 74 $\pm$ 3*      | 57 $\pm$ 3      | 86 $\pm$ 11*     |

**Online Table I.** LV pressure/volume analysis confirmed the deleterious effects of PKC $\epsilon$  expression on LV performance. FVB and PKC $\epsilon$  mice were subjected to LV catheterization under general anesthesia via a subdiaphragmatic approach using a 1.4F pressure-volume catheter. Systolic and diastolic function were both significantly impaired in 3 month-old PKC $\epsilon$  mice, with functional indices exhibiting further progressive declines over the next 9 months. In contrast, systolic and diastolic indices remained relatively constant in FVB mice over the same observation period. By 12 months, most surviving PKC $\epsilon$  mice demonstrated gross left atrial enlargement, pleural and pericardial effusions, and ascites. n, number of experimental animals in each group; bpm, beats per minute; Contractility Index, defined as dP/dt<sub>max</sub> / P at dP/dt<sub>max</sub>; \*P<0.05, FVB vs. PKC $\epsilon$  for each age level by 2-way ANOVA followed by the Holm-Sidak test.

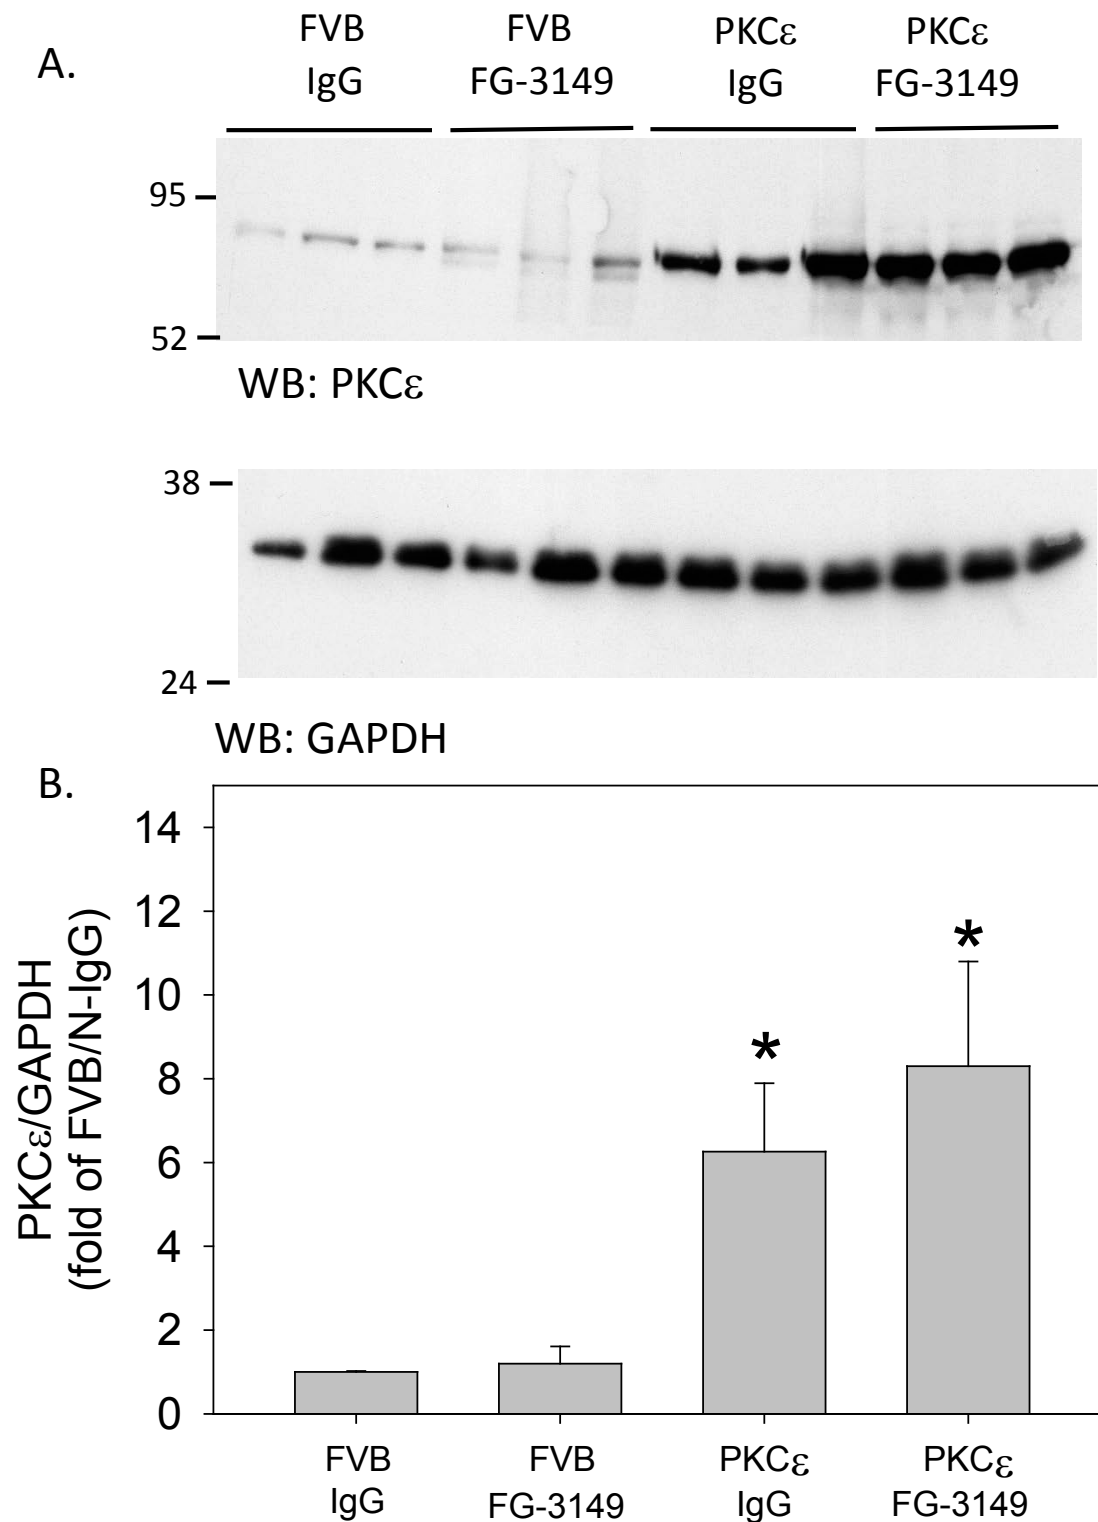

**Online Figure III.** *FG-3149 has no effect on PKC $\epsilon$  expression.* 3mo FVB and PKC $\epsilon$  mice were administered control IgG (IgG; 30mg/kg IP twice weekly for 3mo) or FG-3149, a mouse-specific, neutralizing mAb to CTGF (30mg/kg IP twice weekly for 3mo). LV tissue extracts were then analyzed by for PKC $\epsilon$  expression by Western blotting. (A) Representative Western blot for 3 animals in each group. (B) Quantitative analysis of PKC $\epsilon$  expression (relative to GAPDH) in n=6 mice in each group. \* $P$ <0.05 vs. FVB+IgG by 2-way ANOVA followed by the Holm-Sidak test.

## Online Figure IV

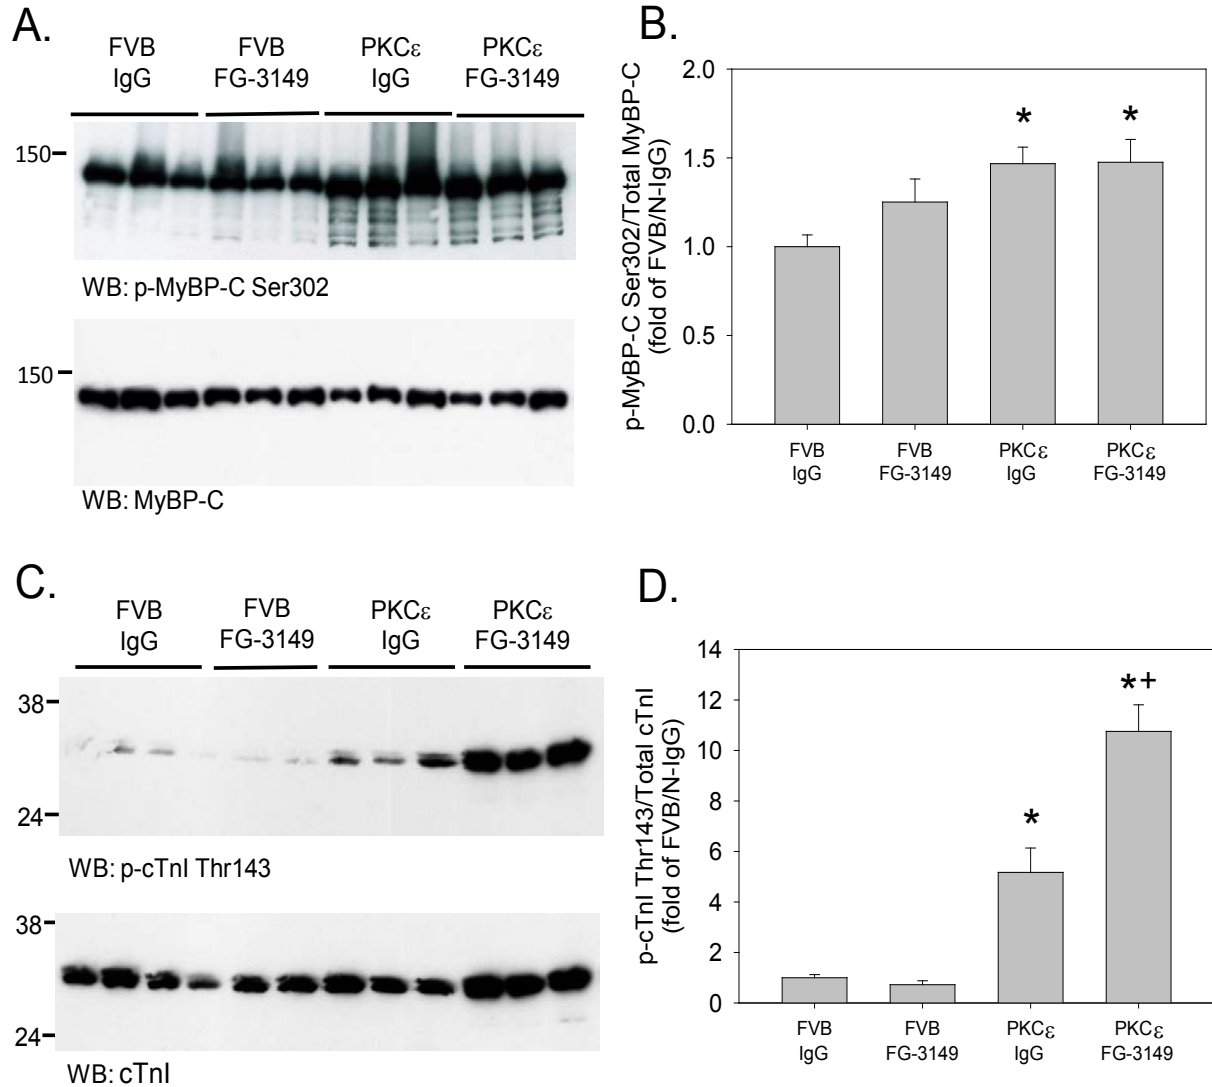

**Online Figure IV. Effects of PKC $\epsilon$  and FG-3149 on myofilament phosphorylation.** 3 mo FVB and PKC $\epsilon$  mice were administered control IgG (IgG; 30mg/kg IP) or FG-3149 (30mg/kg IP), a mouse-specific, neutralizing mAb to CTGF, twice weekly for a period of 3 mo. LV tissue extracts were then analyzed for MyBP-C and cTnI phosphorylation by Western blotting. (A) Representative Western blot of MyBP-C phosphorylation at Ser302 for 3 animals in each group. (B) Quantitative analysis of MyBP-C Ser302 phosphorylation in n=9 mice in each group. (C) Representative Western blot of cTnI Thr143 phosphorylation for 3 animals in each group. (D) Quantitative analysis of cTnI Thr143 phosphorylation in n=9 mice in each group. \* $P$ <0.05 vs. FVB-IgG; \*\* $P$ <0.05 vs. PKC $\epsilon$ -IgG by 2-way ANOVA followed by the Holm-Sidak test.



**A.**

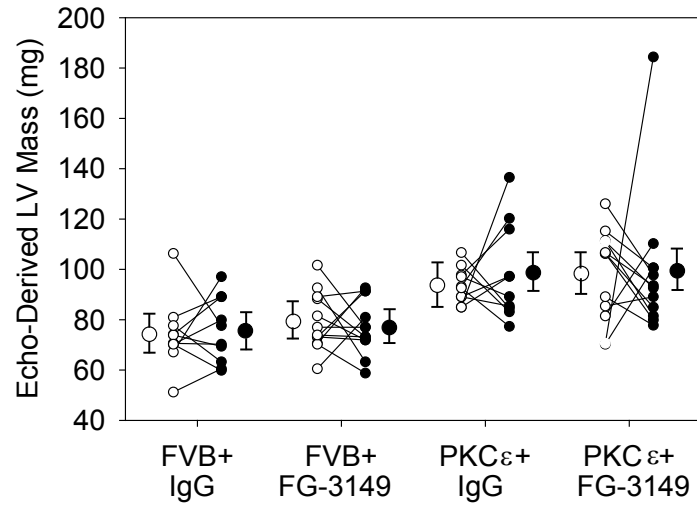

**B.**

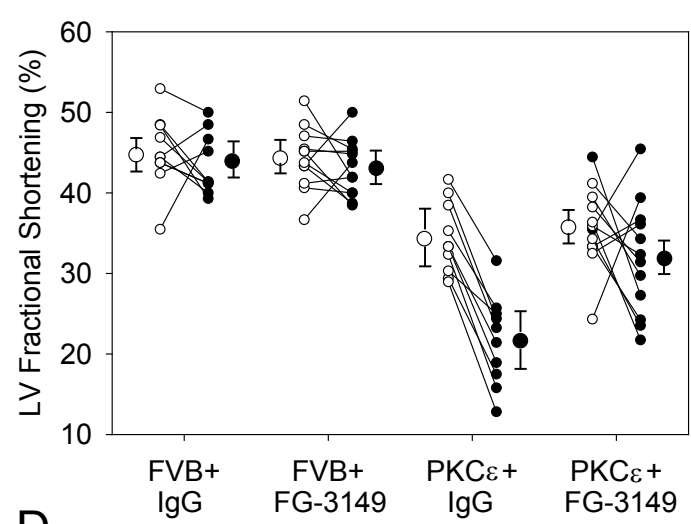

**C.**

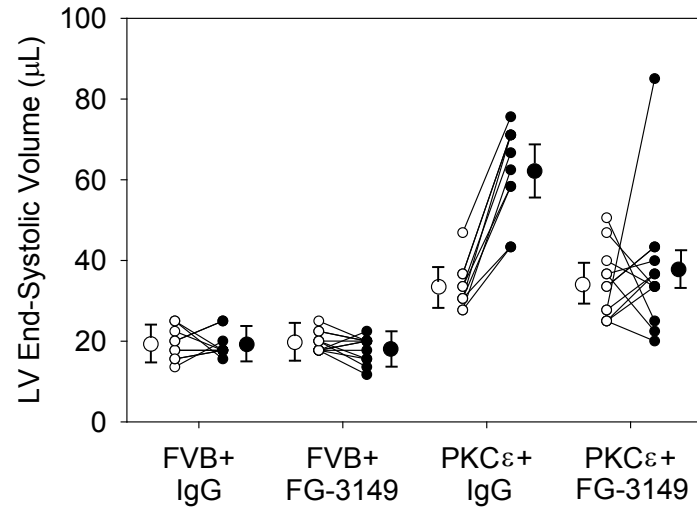

**D.**

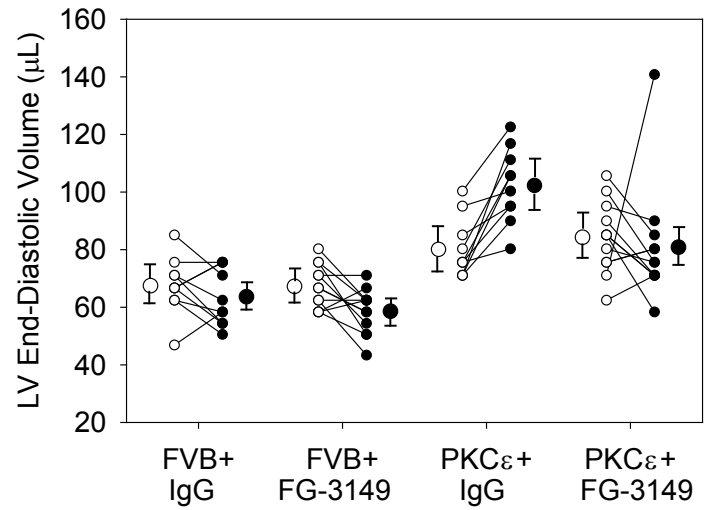

**E.**

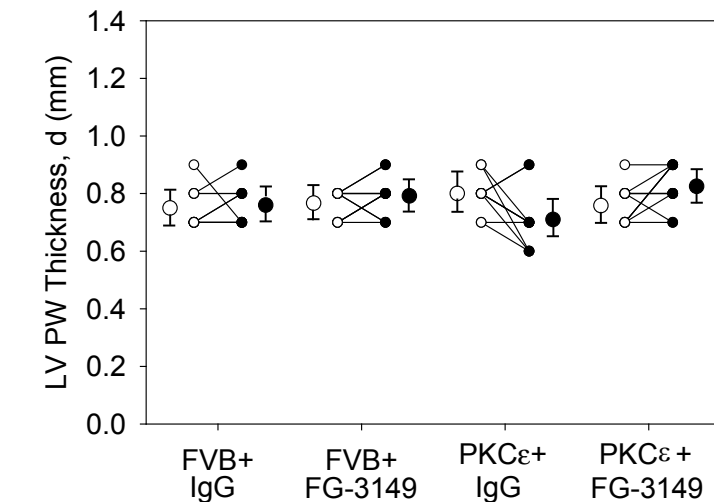

**F.**

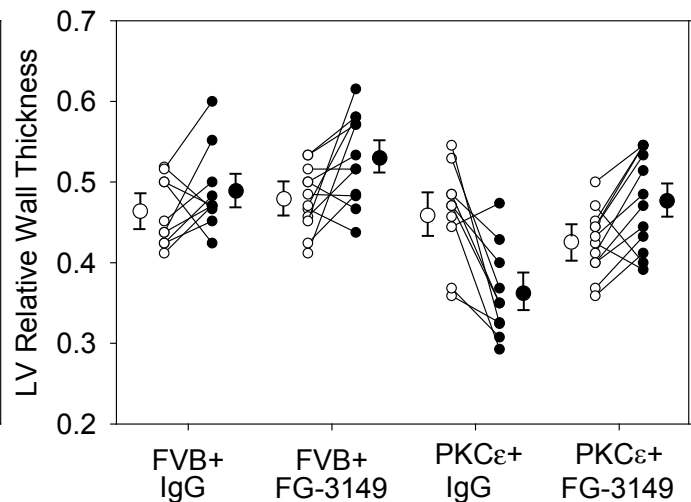

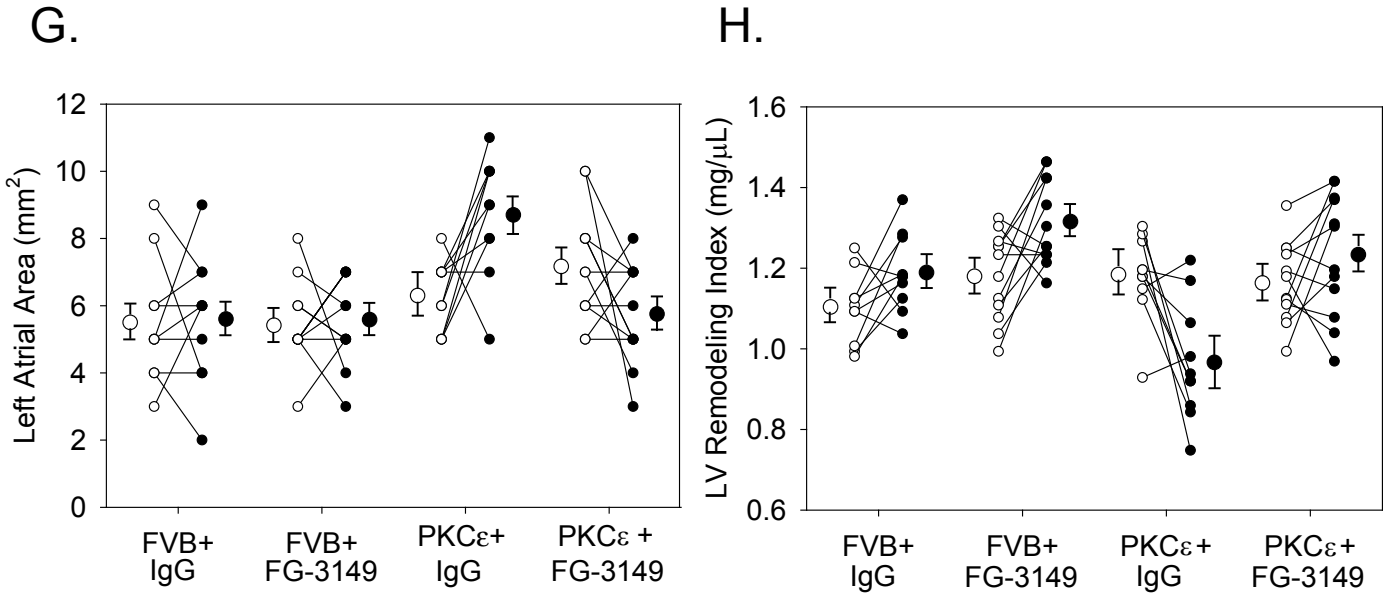

**Online Figure V.** *CTGF neutralizing antibody maintains LV function and slows the progression of LV remodeling in PKC $\epsilon$  mice.* 3 month old FVB (n=22) and PKC $\epsilon$  (n=22) mice underwent baseline M-mode and 2-D echocardiography and were then randomly assigned to receive nonimmune mouse IgG (IgG; 30mg/kg IP) or FG-3149 (30mg/kg IP), a neutralizing mAb to CTGF. Animals were treated twice weekly for a period of 3 months, and were then subjected to repeat M-mode and 2-D echocardiography. Data are responses of individual animals for each parameter before ( $\circ$ ) and after ( $\bullet$ ) treatment. (A) LV Mass (mg); (B) LV Fractional Shortening (%); (C) LV End-Systolic Volume ( $\mu$ L); (D) LV End-Diastolic Volume ( $\mu$ L); (E) LV Posterior Wall Thickness (mm); (F) LV Relative Wall Thickness; (G) Left Atrial Area (mm<sup>2</sup>); and (H) LV Remodeling Index (mg/ $\mu$ L). Mean data $\pm$ SEM for n=10-12 mice in each treatment group are depicted as well.

## Online Table II. FG-3149 Responsive Cardiac Injury Genes

Array probesets ( $n=182$ ) with mean raw fluorescence values  $>50$  in at least one group that were also significantly and substantially altered in IgG-treated PKC $\epsilon$  vs IgG-treated FVB animals and significantly altered by FG-3149 vs IgG in PKC $\epsilon$  mice were identified as described in the Materials and Methods. Fold-change (Fc), percent of Fc reversed by FG-3149 (%), and parametric  $p$  values are provided.  $P$  values were calculated without assuming equal variances or adjusting for multiple comparisons. Fc and  $p$  values are also provided for human gene orthologs that were similarly elevated or diminished at  $p < 0.05$  (or the probeset with the greatest significant Fc if multiple probesets were altered for a given human homolog) in the 74 ischemic, idiopathic dilated, hypertrophic, post-partum and viral cardiomyopathy samples vs 14 non-failing heart samples in the Harvard Cardiogenomics dataset (NCBI GEO Series GSE1145). Genes with bold lettering had expression patterns that were confirmed by qPCR.

| Affymetrix ID                                                                                | Gene ID         | Effect of PKC $\epsilon$ |          | PKC $\epsilon$ Effect Resolved by FG-3149 |          | Altered in Human Cardiomyopathies |          | Description                                                               |
|----------------------------------------------------------------------------------------------|-----------------|--------------------------|----------|-------------------------------------------|----------|-----------------------------------|----------|---------------------------------------------------------------------------|
|                                                                                              |                 | Fc                       | $p$      | %                                         | $p$      | Fc                                | $p$      |                                                                           |
| <b>Genes elevated in caPKC<math>\epsilon</math> hearts and partially resolved by FG-3149</b> |                 |                          |          |                                           |          |                                   |          |                                                                           |
| 1418476_at                                                                                   | Crif1           | 8.3                      | < 0.0001 | 66                                        | 0.005    |                                   |          | cytokine receptor-like factor 1                                           |
| 1418061_at                                                                                   | <b>Ltbp2</b>    | 6.3                      | < 0.0001 | 86                                        | 0.0008   | 2.7                               | < 0.0001 | latent transforming growth factor beta binding protein 2                  |
| 1451922_at                                                                                   | Lman1l          | 6.2                      | < 0.0001 | 43                                        | 0.0009   |                                   |          | lectin, mannose-binding 1 like                                            |
| 1418440_at                                                                                   | Col8a1          | 4.7                      | < 0.0001 | 48                                        | 0.005    | 1.8                               | < 0.0001 | collagen, type VIII, alpha 1                                              |
| 1449388_at                                                                                   | Thbs4           | 4.6                      | < 0.0001 | 29                                        | 0.03     | 2.1                               | < 0.0001 | thrombospondin 4                                                          |
| 1427910_at                                                                                   | Cst6            | 4.5                      | < 0.0001 | 56                                        | 0.007    |                                   |          | cystatin E/M                                                              |
| 1425039_at                                                                                   | Itgbl1          | 4.4                      | < 0.0001 | 52                                        | 0.01     | 7.7                               | < 0.0001 | integrin, beta-like 1                                                     |
| 1417595_at                                                                                   | Meox1           | 4.4                      | < 0.0001 | 57                                        | 0.006    |                                   |          | mesenchyme homeobox 1                                                     |
| 1423606_at                                                                                   | <b>Postn</b>    | 4.4                      | < 0.0001 | 66                                        | 0.02     | 2.8                               | < 0.0001 | periostin, osteoblast specific factor                                     |
| 1418937_at                                                                                   | Dio2            | 4.2                      | 0.001    | 89                                        | 0.009    | 1.5                               | 0.002    | deiodinase, iodothyronine, type II                                        |
| 1448254_at                                                                                   | Ptn             | 4.0                      | < 0.0001 | 41                                        | 0.04     | 3.3                               | < 0.0001 | pleiotrophin                                                              |
| 1460227_at                                                                                   | <b>Timp1</b>    | 3.7                      | 0.0009   | 88                                        | 0.006    |                                   |          | tissue inhibitor of metalloproteinase 1                                   |
| 1456062_at                                                                                   | Nppa            | 3.7                      | 0.01     | 47                                        | 0.003    | 2.4                               | 0.003    | natriuretic peptide type A                                                |
| 1423110_at                                                                                   | <b>Col1a2</b>   | 3.7                      | < 0.0001 | 48                                        | 0.003    | 2.1                               | 0.002    | collagen, type I, alpha 2                                                 |
| 1427256_at                                                                                   | Vcan            | 3.7                      | < 0.0001 | 61                                        | 0.006    |                                   |          | versican                                                                  |
| 1450625_at                                                                                   | <b>Col5a2</b>   | 3.5                      | < 0.0001 | 59                                        | 0.005    | 1.7                               | 0.001    | collagen, type V, alpha 2                                                 |
| 1459546_s_at                                                                                 | Enpp1           | 3.3                      | < 0.0001 | 51                                        | 0.02     |                                   |          | ectonucleotide pyrophosphatase/phosphodiesterase 1                        |
| 1416600_a_at                                                                                 | Rcan1           | 3.3                      | < 0.0001 | 56                                        | < 0.0001 |                                   |          | regulator of calcineurin 1                                                |
| 1421694_a_at                                                                                 | Vcan            | 3.3                      | < 0.0001 | 63                                        | 0.008    |                                   |          | versican                                                                  |
| 1449380_at                                                                                   | Pacsin1         | 3.2                      | < 0.0001 | 39                                        | 0.04     |                                   |          | protein kinase C and casein kinase substrate in neurons 1                 |
| 1419466_at                                                                                   | Nkd2            | 3.2                      | 0.0006   | 70                                        | 0.04     |                                   |          | naked cuticle 2 homolog (Drosophila)                                      |
| 1416688_at                                                                                   | Snap91          | 3.2                      | < 0.0001 | 39                                        | 0.0003   |                                   |          | synaptosomal-associated protein 91                                        |
| 1448169_at                                                                                   | Krt18           | 3.1                      | 0.0009   | 68                                        | 0.03     |                                   |          | keratin 18                                                                |
| 1428922_at                                                                                   | Tril            | 3.1                      | < 0.0001 | 54                                        | < 0.0001 | 2.4                               | < 0.0001 | TLR4 interactor with leucine-rich repeats                                 |
| 1426754_x_at                                                                                 | Ckap4           | 3.1                      | < 0.0001 | 28                                        | 0.009    |                                   |          | cytoskeleton-associated protein 4                                         |
| 1418796_at                                                                                   | Clec11a         | 3.0                      | 0.0002   | 66                                        | 0.03     |                                   |          | C-type lectin domain family 11, member a                                  |
| 1452181_at                                                                                   | Ckap4           | 3.0                      | < 0.0001 | 31                                        | 0.009    |                                   |          | cytoskeleton-associated protein 4                                         |
| 1423352_at                                                                                   | Crispld1        | 2.9                      | 0.0003   | 72                                        | 0.02     |                                   |          | cysteine-rich secretory protein LCCL domain containing 1                  |
| 1423407_a_at                                                                                 | Fbln2           | 2.9                      | < 0.0001 | 49                                        | 0.0002   | 2.3                               | 0.002    | fibulin 2                                                                 |
| 1416666_at                                                                                   | <b>Serpine2</b> | 2.9                      | < 0.0001 | 54                                        | < 0.0001 | 1.4                               | < 0.0001 | serine (or cysteine) peptidase inhibitor, clade E, member 2               |
| 1455494_at                                                                                   | <b>Col1a1</b>   | 2.9                      | < 0.0001 | 58                                        | < 0.0001 | 2.3                               | < 0.0001 | collagen, type I, alpha 1                                                 |
| 1460208_at                                                                                   | <b>Fbn1</b>     | 2.9                      | < 0.0001 | 69                                        | < 0.0001 |                                   |          | fibrillin 1                                                               |
| 1448475_at                                                                                   | Olfml3          | 2.8                      | < 0.0001 | 41                                        | 0.01     | 1.8                               | 0.002    | olfactomedin-like 3                                                       |
| 1427257_at                                                                                   | Vcan            | 2.8                      | < 0.0001 | 59                                        | 0.02     |                                   |          | versican                                                                  |
| 1427884_at                                                                                   | <b>Col3a1</b>   | 2.8                      | < 0.0001 | 69                                        | 0.0002   | 2.0                               | 0.0005   | collagen, type III, alpha 1                                               |
| 1448259_at                                                                                   | Fstl1           | 2.8                      | < 0.0001 | 57                                        | 0.006    | 1.5                               | 0.03     | follicle-stimulating-like 1                                               |
| 1424704_at                                                                                   | Runx2           | 2.7                      | < 0.0001 | 31                                        | 0.03     | 1.7                               | < 0.0001 | runt related transcription factor 2                                       |
| 1422324_a_at                                                                                 | Pthlh           | 2.7                      | 0.0006   | 72                                        | 0.02     |                                   |          | parathyroid hormone-like peptide                                          |
| 1422437_at                                                                                   | <b>Col5a2</b>   | 2.7                      | < 0.0001 | 52                                        | 0.01     | 1.7                               | 0.0009   | collagen, type V, alpha 2                                                 |
| 1448323_a_at                                                                                 | Bgn             | 2.7                      | < 0.0001 | 50                                        | 0.009    | 1.6                               | 0.0003   | biglycan                                                                  |
| 1428074_at                                                                                   | Tmem158         | 2.6                      | < 0.0001 | 75                                        | 0.004    |                                   |          | transmembrane protein 158                                                 |
| 1452436_at                                                                                   | Loxl2           | 2.6                      | < 0.0001 | 45                                        | 0.02     | 1.4                               | 0.01     | lysyl oxidase-like 2                                                      |
| 1426755_at                                                                                   | Ckap4           | 2.6                      | < 0.0001 | 57                                        | < 0.0001 |                                   |          | cytoskeleton-associated protein 4                                         |
| 1416405_at                                                                                   | Bgn             | 2.6                      | < 0.0001 | 45                                        | 0.01     | 1.6                               | 0.0003   | biglycan                                                                  |
| 1456307_s_at                                                                                 | Adcy7           | 2.6                      | < 0.0001 | 49                                        | 0.008    | 1.3                               | 0.02     | adenylate cyclase 7                                                       |
| 1424950_at                                                                                   | Sox9            | 2.6                      | < 0.0001 | 42                                        | 0.003    |                                   |          | SRY-box containing gene 9                                                 |
| 1417343_at                                                                                   | Fxyd6           | 2.6                      | < 0.0001 | 48                                        | < 0.0001 | 1.4                               | 0.008    | FXYD domain-containing ion transport regulator 6                          |
| 1418538_at                                                                                   | Kdelr3          | 2.5                      | < 0.0001 | 43                                        | 0.02     | 1.4                               | 0.01     | KDEL (Lys-Asp-Glu-Leu) endoplasmic reticulum protein retention receptor 3 |
| 1427298_at                                                                                   | Dnm3os          | 2.5                      | < 0.0001 | 71                                        | 0.006    |                                   |          | dynamin 3, opposite strand                                                |
| 1416529_at                                                                                   | Emp1            | 2.5                      | < 0.0001 | 48                                        | 0.004    |                                   |          | epithelial membrane protein 1                                             |
| 1434089_at                                                                                   | Synpo           | 2.5                      | < 0.0001 | 60                                        | 0.01     |                                   |          | synaptopodin                                                              |
| 1448590_at                                                                                   | Col6a1          | 2.5                      | < 0.0001 | 39                                        | 0.009    | 1.3                               | 0.001    | collagen, type VI, alpha 1                                                |
| 1438789_s_at                                                                                 | Dpysl3          | 2.5                      | < 0.0001 | 65                                        | 0.007    | 2.2                               | 0.0003   | dihydropyrimidinase-like 3                                                |
| 1419123_a_at                                                                                 | Pdgfc           | 2.5                      | 0.0009   | 90                                        | < 0.0001 | 1.2                               | 0.04     | platelet-derived growth factor, C polypeptide                             |
| 1416221_at                                                                                   | Fstl1           | 2.5                      | < 0.0001 | 62                                        | 0.003    | 1.5                               | 0.03     | follicle-stimulating-like 1                                               |
| 1421045_at                                                                                   | Mrc2            | 2.5                      | < 0.0001 | 53                                        | 0.0005   | 1.5                               | 0.0007   | mannose receptor, C type 2                                                |
| 1455019_x_at                                                                                 | Ckap4           | 2.5                      | < 0.0001 | 47                                        | < 0.0001 |                                   |          | cytoskeleton-associated protein 4                                         |
| 1416069_at                                                                                   | Pfkip           | 2.4                      | < 0.0001 | 43                                        | 0.005    |                                   |          | phosphofructokinase, platelet                                             |
| 1417507_at                                                                                   | Cyb561          | 2.4                      | < 0.0001 | 60                                        | < 0.0001 |                                   |          | cytochrome b-561                                                          |
| 1425896_a_at                                                                                 | <b>Fbn1</b>     | 2.4                      | < 0.0001 | 72                                        | < 0.0001 | 1.5                               | < 0.0001 | fibrillin 1                                                               |
| 1452250_a_at                                                                                 | Col6a2          | 2.4                      | < 0.0001 | 42                                        | 0.006    | 1.2                               | 0.04     | collagen, type VI, alpha 2                                                |
| 1451538_at                                                                                   | Sox9            | 2.4                      | < 0.0001 | 41                                        | 0.003    |                                   |          | SRY-box containing gene 9                                                 |
| 1415877_at                                                                                   | Dpysl3          | 2.4                      | < 0.0001 | 68                                        | 0.0006   | 2.2                               | 0.0003   | dihydropyrimidinase-like 3                                                |
| 1449351_s_at                                                                                 | Pdgfc           | 2.4                      | 0.0008   | 82                                        | 0.0005   | 1.2                               | 0.04     | platelet-derived growth factor, C polypeptide                             |
| 1420371_at                                                                                   | Sntb2           | 2.4                      | < 0.0001 | 70                                        | < 0.0001 | 1.7                               | < 0.0001 | syntrophin, basic 2                                                       |
| 1453839_a_at                                                                                 | Pi16            | 2.4                      | < 0.0001 | 65                                        | 0.005    | 1.4                               | 0.004    | peptidase inhibitor 16                                                    |
| 1448433_a_at                                                                                 | Pcolce          | 2.4                      | < 0.0001 | 53                                        | 0.001    | 1.6                               | 0.006    | procollagen C-endopeptidase enhancer protein                              |
| 1438651_a_at                                                                                 | Aplnr           | 2.4                      | < 0.0001 | 52                                        | 0.001    |                                   |          | apelin receptor                                                           |
| 1417534_at                                                                                   | Itgb5           | 2.4                      | < 0.0001 | 27                                        | 0.03     | 1.6                               | 0.01     | integrin beta 5                                                           |
| 1451978_at                                                                                   | Loxl1           | 2.4                      | < 0.0001 | 48                                        | 0.006    | 1.4                               | 0.02     | lysyl oxidase-like 1                                                      |
| 1450857_a_at                                                                                 | <b>Col1a2</b>   | 2.4                      | < 0.0001 | 37                                        | 0.02     | 2.1                               | 0.002    | collagen, type I, alpha 2                                                 |

|                                                                                                 |               |      |          |     |          |      |          |  |                                                                            |
|-------------------------------------------------------------------------------------------------|---------------|------|----------|-----|----------|------|----------|--|----------------------------------------------------------------------------|
| 1460285_at                                                                                      | Itga9         | 2.4  | < 0.0001 | 36  | 0.02     |      |          |  | integrin alpha 9                                                           |
| 1454613_at                                                                                      | Dpysl3        | 2.4  | 0.0001   | 58  | 0.02     | 2.2  | 0.0003   |  | dihydropyrimidinase-like 3                                                 |
| 1448228_at                                                                                      | Lox           | 2.4  | 0.006    | 89  | 0.02     | 1.8  | 0.0009   |  | lysyl oxidase                                                              |
| 1427034_at                                                                                      | Ace           | 2.3  | < 0.0001 | 43  | 0.0002   |      |          |  | angiotensin I converting enzyme (peptidyl-dipeptidase A) 1                 |
| 1451596_a_at                                                                                    | Sphk1         | 2.3  | < 0.0001 | 68  | 0.005    |      |          |  | sphingosine kinase 1                                                       |
| 1418269_at                                                                                      | Loxl3         | 2.3  | 0.0001   | 76  | 0.005    |      |          |  | lysyl oxidase-like 3                                                       |
| 1437165_a_at                                                                                    | Pcolce        | 2.3  | < 0.0001 | 54  | 0.0009   | 1.6  | 0.006    |  | procollagen C-endopeptidase enhancer protein                               |
| 1426784_at                                                                                      | Trim47        | 2.3  | < 0.0001 | 48  | 0.02     |      |          |  | tripartite motif-containing 47                                             |
| 1452382_at                                                                                      | Dnm3os        | 2.3  | < 0.0001 | 64  | 0.003    |      |          |  | dynamitin 3, opposite strand                                               |
| 1437889_x_at                                                                                    | Bgn           | 2.3  | < 0.0001 | 45  | 0.01     | 1.6  | 0.0003   |  | biglycan                                                                   |
| 1416379_at                                                                                      | Panx1         | 2.3  | 0.0002   | 74  | 0.009    |      |          |  | pannexin 1                                                                 |
| 1434479_at                                                                                      | Col5a1        | 2.3  | < 0.0001 | 37  | 0.002    | 1.6  | 0.0002   |  | collagen, type V, alpha 1                                                  |
| 1416740_at                                                                                      | Col5a1        | 2.3  | < 0.0001 | 45  | 0.0006   | 1.6  | 0.0002   |  | collagen, type V, alpha 1                                                  |
| 1417455_at                                                                                      | Tgfb3         | 2.3  | 0.0004   | 65  | 0.02     | 1.2  | 0.01     |  | transforming growth factor, beta 3                                         |
| 1421037_at                                                                                      | Npas2         | 2.3  | 0.002    | 114 | < 0.0001 |      |          |  | neuronal PAS domain protein 2                                              |
| 1416414_at                                                                                      | Emilin1       | 2.3  | < 0.0001 | 43  | 0.02     |      |          |  | elastin microfibril interfacer 1                                           |
| 1424414_at                                                                                      | Ogfr1         | 2.3  | < 0.0001 | 38  | 0.0001   | 1.6  | < 0.0001 |  | opioid growth factor receptor-like 1                                       |
| 1448655_at                                                                                      | Lrp1          | 2.2  | < 0.0001 | 40  | 0.01     |      |          |  | low density lipoprotein receptor-related protein 1                         |
| 1456195_x_at                                                                                    | Itgb5         | 2.2  | < 0.0001 | 35  | 0.003    | 1.6  | 0.01     |  | integrin beta 5                                                            |
| 1426399_at                                                                                      | Vwa1          | 2.2  | < 0.0001 | 32  | 0.0004   |      |          |  | von Willebrand factor A domain containing 1                                |
| 1422705_at                                                                                      | Pmepa1        | 2.2  | < 0.0001 | 53  | 0.03     | 1.4  | 0.05     |  | prostate transmembrane protein, androgen induced 1                         |
| 1456133_x_at                                                                                    | Itgb5         | 2.2  | < 0.0001 | 42  | 0.0008   | 1.6  | 0.01     |  | integrin beta 5                                                            |
| 1417533_a_at                                                                                    | Itgb5         | 2.2  | < 0.0001 | 29  | 0.01     | 1.6  | 0.01     |  | integrin beta 5                                                            |
| 1452357_at                                                                                      | Gp1bb / Sept5 | 2.2  | < 0.0001 | 61  | 0.003    |      |          |  | glycoprotein Ib, beta polypeptide / septin 5                               |
| 1423585_at                                                                                      | Igfbp7        | 2.2  | < 0.0001 | 47  | 0.008    | 1.2  | 0.002    |  | insulin-like growth factor binding protein 7                               |
| 1449022_at                                                                                      | Nes           | 2.2  | < 0.0001 | 45  | 0.02     |      |          |  | nestin                                                                     |
| 1416165_at                                                                                      | Rab31         | 2.2  | < 0.0001 | 45  | < 0.0001 |      |          |  | RAB31, member RAS oncogene family                                          |
| 1448428_at                                                                                      | Nbl1          | 2.2  | 0.001    | 71  | 0.04     | 1.5  | < 0.0001 |  | neuroblastoma, suppression of tumorigenicity 1                             |
| 1423429_at                                                                                      | Rhox5         | 2.2  | < 0.0001 | 43  | 0.02     |      |          |  | reproductive homeobox 5                                                    |
| 1419665_a_at                                                                                    | Nupr1         | 2.2  | 0.003    | 73  | 0.04     |      |          |  | nuclear protein 1                                                          |
| 1424131_at                                                                                      | Col6a3        | 2.2  | < 0.0001 | 30  | 0.01     |      |          |  | collagen, type VI, alpha 3                                                 |
| 1416805_at                                                                                      | Fam198b       | 2.1  | < 0.0001 | 41  | 0.04     |      |          |  | family with sequence similarity 198, member B                              |
| 1435110_at                                                                                      | Unc5b         | 2.1  | < 0.0001 | 51  | 0.02     | 1.4  | < 0.0001 |  | unc-5 homolog B (C. elegans)                                               |
| 1423341_at                                                                                      | Cspg4         | 2.1  | < 0.0001 | 53  | 0.0008   |      |          |  | chondroitin sulfate proteoglycan 4                                         |
| 1427418_a_at                                                                                    | Hif1a         | 2.1  | < 0.0001 | 19  | 0.02     |      |          |  | hypoxia inducible factor 1, alpha subunit                                  |
| 1448931_at                                                                                      | F2r1          | 2.1  | 0.0003   | 60  | 0.03     |      |          |  | coagulation factor II (thrombin) receptor-like 1                           |
| 1424413_at                                                                                      | Ogfr1         | 2.1  | < 0.0001 | 26  | 0.03     | 1.6  | < 0.0001 |  | opioid growth factor receptor-like 1                                       |
| 1455271_at                                                                                      | Gm13889       | 2.1  | < 0.0001 | 56  | 0.003    |      |          |  | predicted gene 13889                                                       |
| 1448698_at                                                                                      | Ccnd1         | 2.1  | < 0.0001 | 33  | 0.01     | 1.5  | 0.001    |  | cyclin D1                                                                  |
| 1448395_at                                                                                      | Sfrp1         | 2.0  | < 0.0001 | 52  | 0.02     | 2.1  | 0.01     |  | secreted frizzled-related protein 1                                        |
| 1439191_at                                                                                      | ---           | 2.0  | 0.007    | 104 | 0.0008   |      |          |  | ---                                                                        |
| 1426926_at                                                                                      | Plcg2         | 2.0  | < 0.0001 | 25  | 0.03     |      |          |  | phospholipase C, gamma 2                                                   |
| 1451289_at                                                                                      | Dclk1         | 2.0  | 0.002    | 69  | 0.03     |      |          |  | doublecortin-like kinase 1                                                 |
| 1423790_at                                                                                      | Dap           | 2.0  | 0.0003   | 56  | 0.01     |      |          |  | death-associated protein                                                   |
| 1416759_at                                                                                      | Mical1        | 2.0  | < 0.0001 | 44  | 0.009    |      |          |  | microtubule associated monooxygenase, calponin and LIM domain containing 1 |
| 1452368_at                                                                                      | Bcr           | 2.0  | 0.0004   | 62  | 0.04     |      |          |  | breakpoint cluster region                                                  |
| 1450355_a_at                                                                                    | Capg          | 2.0  | < 0.0001 | 50  | 0.03     |      |          |  | capping protein (actin filament), gelsolin-like                            |
| 1449002_at                                                                                      | Phlda3        | 2.0  | < 0.0001 | 45  | 0.02     |      |          |  | pleckstrin homology-like domain, family A, member 3                        |
| 1449281_at                                                                                      | Nrtn          | 2.0  | 0.003    | 59  | 0.003    |      |          |  | neurturin                                                                  |
| 1418733_at                                                                                      | Twist1        | 2.0  | < 0.0001 | 49  | 0.009    |      |          |  | twist homolog 1 (Drosophila)                                               |
| 1452035_at                                                                                      | Col4a1        | 2.0  | < 0.0001 | 66  | < 0.0001 |      |          |  | collagen, type IV, alpha 1                                                 |
| <b>Genes diminished in caPKC <math>\epsilon</math> hearts and partially resolved by FG-3149</b> |               |      |          |     |          |      |          |  |                                                                            |
| 1449081_at                                                                                      | Ces1d         | 0.15 | < 0.0001 | 17  | 0.001    |      |          |  | carboxylesterase 1D                                                        |
| 1435370_a_at                                                                                    | Ces1d         | 0.18 | < 0.0001 | 15  | 0.02     |      |          |  | carboxylesterase 1D                                                        |
| 1427213_at                                                                                      | Pfkfb1        | 0.22 | < 0.0001 | 20  | 0.03     |      |          |  | 6-phosphofructo-2-kinase/fructose-2,6-bisphosphatase 1                     |
| 1435371_x_at                                                                                    | Ces1d         | 0.26 | < 0.0001 | 25  | 0.007    |      |          |  | carboxylesterase 1D                                                        |
| 1421928_at                                                                                      | Epha4         | 0.27 | < 0.0001 | 22  | < 0.0001 |      |          |  | Eph receptor A4                                                            |
| 1424737_at                                                                                      | Thrsp         | 0.27 | < 0.0001 | 7   | 0.008    |      |          |  | thyroid hormone responsive SPOT14 homolog (Rattus)                         |
| 1423085_at                                                                                      | Efnb3         | 0.28 | 0.0001   | 27  | 0.03     |      |          |  | ephrin B3                                                                  |
| 1453678_at                                                                                      | Mbd1          | 0.30 | < 0.0001 | 19  | 0.03     | 0.68 | 0.01     |  | methyl-CpG binding domain protein 1                                        |
| 1421929_at                                                                                      | Epha4         | 0.31 | < 0.0001 | 10  | 0.03     |      |          |  | Eph receptor A4                                                            |
| 1422973_a_at                                                                                    | Thrsp         | 0.32 | < 0.0001 | 10  | 0.006    |      |          |  | thyroid hormone responsive SPOT14 homolog (Rattus)                         |
| 1455061_a_at                                                                                    | Acaa2         | 0.32 | < 0.0001 | 35  | 0.007    |      |          |  | acetyl-Coenzyme A acyltransferase 2                                        |
| 1421063_s_at                                                                                    | Snrpn / Snurf | 0.33 | < 0.0001 | 41  | < 0.0001 | 0.74 | 0.002    |  | small nuclear ribonucleoprotein N / SNRPN upstream reading frame           |
| 1449065_at                                                                                      | Acot1         | 0.34 | < 0.0001 | 43  | 0.007    |      |          |  | acyl-CoA thioesterase 1                                                    |
| 1436833_x_at                                                                                    | Ttll1         | 0.34 | < 0.0001 | 25  | 0.02     |      |          |  | tubulin tyrosine ligase-like 1                                             |
| 1454638_a_at                                                                                    | Pah           | 0.34 | 0.0002   | 29  | 0.01     |      |          |  | phenylalanine hydroxylase                                                  |
| 1417729_at                                                                                      | Myh6          | 0.37 | < 0.0001 | 31  | 0.002    | 0.34 | < 0.0001 |  | myosin, heavy polypeptide 6, cardiac muscle, alpha                         |
| 1451270_at                                                                                      | Dusp18        | 0.37 | < 0.0001 | 32  | < 0.0001 |      |          |  | dual specificity phosphatase 18                                            |
| 1460732_a_at                                                                                    | Ppl           | 0.38 | 0.0006   | 31  | 0.03     | 0.74 | 0.01     |  | periplakin                                                                 |
| 1417765_a_at                                                                                    | Amy1          | 0.38 | < 0.0001 | 39  | < 0.0001 |      |          |  | amylase 1, salivary                                                        |
| 1426263_at                                                                                      | Cadm4         | 0.38 | < 0.0001 | 29  | 0.0003   |      |          |  | cell adhesion molecule 4                                                   |
| 1452823_at                                                                                      | Gstk1         | 0.39 | < 0.0001 | 26  | 0.003    |      |          |  | glutathione S-transferase kappa 1                                          |
| 1424226_at                                                                                      | 9030617O03Rik | 0.40 | < 0.0001 | 20  | 0.006    |      |          |  | RIKEN cDNA 9030617O03 gene                                                 |
| 1421488_at                                                                                      | Rabgap1       | 0.40 | < 0.0001 | 24  | 0.02     |      |          |  | RAB GTPase activating protein 1-like                                       |
| 1423183_at                                                                                      | Lgi1          | 0.41 | 0.005    | 71  | 0.004    |      |          |  | leucine-rich repeat LGI family, member 1                                   |
| 1421468_at                                                                                      | Kcnj3         | 0.41 | 0.0006   | 24  | 0.002    |      |          |  | potassium inwardly-rectifying channel, subfamily J, member 3               |
| 1418093_a_at                                                                                    | Egf           | 0.42 | < 0.0001 | 32  | 0.003    |      |          |  | epidermal growth factor                                                    |
| 1449088_at                                                                                      | Fbp2          | 0.42 | 0.0002   | 48  | 0.02     |      |          |  | fructose bisphosphatase 2                                                  |
| 1451776_s_at                                                                                    | Hopx          | 0.42 | < 0.0001 | 49  | 0.002    | 0.41 | 0.002    |  | HOP homeobox                                                               |
| 1427202_at                                                                                      | Mettl20       | 0.42 | < 0.0001 | 36  | < 0.0001 |      |          |  | methyltransferase like 20                                                  |
| 1425164_a_at                                                                                    | Phkg1         | 0.43 | 0.0005   | 29  | 0.01     |      |          |  | phosphorylase kinase gamma 1                                               |
| 1423892_at                                                                                      | Apbb1         | 0.43 | < 0.0001 | 27  | 0.01     | 0.82 | 0.01     |  | amyloid beta (A4) precursor protein-binding, family B, member 1            |
| 1426010_a_at                                                                                    | Ep4.113       | 0.43 | < 0.0001 | 38  | 0.0002   |      |          |  | erythrocyte protein band 4.1-like 3                                        |
| 1455531_at                                                                                      | Mfsd4         | 0.43 | < 0.0001 | 27  | 0.004    |      |          |  | major facilitator superfamily domain containing 4                          |
| 1423893_x_at                                                                                    | Apbb1         | 0.44 | < 0.0001 | 27  | 0.01     | 0.82 | 0.01     |  | amyloid beta (A4) precursor protein-binding, family B, member 1            |
| 1425619_s_at                                                                                    | Dsg2          | 0.44 | < 0.0001 | 24  | 0.002    |      |          |  | desmoglein 2                                                               |
| 1449501_a_at                                                                                    | Gzmm          | 0.45 | < 0.0001 | 11  | 0.03     |      |          |  | granzyme M (lymphocyte met-ase 1)                                          |
| 1422996_at                                                                                      | Acot2         | 0.45 | < 0.0001 | 48  | 0.005    |      |          |  | acyl-CoA thioesterase 2                                                    |

|              |                 |      |          |    |        |      |       |                                                                        |
|--------------|-----------------|------|----------|----|--------|------|-------|------------------------------------------------------------------------|
| 1453355_at   | Wnk2            | 0.45 | < 0.0001 | 22 | 0.01   |      |       | WNK lysine deficient protein kinase 2                                  |
| 1427964_at   | Cmtm8           | 0.45 | < 0.0001 | 20 | 0.01   |      |       | CKLF-like MARVEL transmembrane domain containing 8                     |
| 1424393_s_at | Adhfe1          | 0.46 | < 0.0001 | 49 | 0.002  |      |       | alcohol dehydrogenase, iron containing, 1                              |
| 1448609_at   | Tst             | 0.46 | < 0.0001 | 26 | 0.002  |      |       | thiosulfate sulfurtransferase, mitochondrial                           |
| 1422997_s_at | Acot1 / Acot2   | 0.46 | < 0.0001 | 43 | 0.005  |      |       | acyl-CoA thioesterase 1 / acyl-CoA thioesterase 2                      |
| 1428662_a_at | Hopx            | 0.47 | < 0.0001 | 45 | 0.004  | 0.41 | 0.002 | HOP homeobox                                                           |
| 1435716_x_at | Snrpn / Snurf   | 0.47 | < 0.0001 | 21 | 0.007  | 0.74 | 0.002 | small nuclear ribonucleoprotein N / SNRPN upstream reading frame       |
| 1424392_at   | Adhfe1          | 0.47 | < 0.0001 | 48 | 0.001  |      |       | alcohol dehydrogenase, iron containing, 1                              |
| 1439476_at   | Dsg2            | 0.48 | < 0.0001 | 22 | 0.04   |      |       | desmoglein 2                                                           |
| 1419209_at   | Cxcl1           | 0.48 | 0.005    | 69 | 0.004  | 0.56 | 0.03  | chemokine (C-X-C motif) ligand 1                                       |
| 1422315_x_at | Phkg1           | 0.48 | 0.001    | 20 | 0.04   |      |       | phosphorylase kinase gamma 1                                           |
| 1449984_at   | Cxcl2           | 0.48 | 0.001    | 39 | 0.02   |      |       | chemokine (C-X-C motif) ligand 2                                       |
| 1426427_at   | Tll1            | 0.48 | < 0.0001 | 19 | 0.009  |      |       | tubulin tyrosine ligase-like 1                                         |
| 1428021_at   | Mccc2           | 0.48 | < 0.0001 | 41 | 0.006  | 0.69 | 0.04  | methylcrotonyl-Coenzyme A carboxylase 2 (beta)                         |
| 1416154_at   | Srp54a / Srp54b | 0.49 | < 0.0001 | 34 | 0.01   |      |       | signal recognition particle 54A / signal recognition particle 54B      |
| 1460316_at   | Acs1            | 0.49 | < 0.0001 | 27 | 0.04   |      |       | acyl-CoA synthetase long-chain family member 1                         |
| 1448136_at   | Enpp2           | 0.49 | 0.001    | 22 | 0.03   |      |       | ectonucleotide pyrophosphatase/phosphodiesterase 2                     |
| 1436791_at   | Wnt5a           | 0.49 | < 0.0001 | 27 | 0.01   |      |       | wingless-related MMTV integration site 5A                              |
| 1448181_at   | Klf15           | 0.49 | < 0.0001 | 47 | 0.0003 |      |       | Kruppel-like factor 15                                                 |
| 1417823_at   | Gcat            | 0.50 | < 0.0001 | 26 | 0.02   | 0.66 | 0.002 | glycine C-acetyltransferase (2-amino-3-ketobutyrate-coenzyme A ligase) |
| 1428145_at   | Acaa2           | 0.50 | 0.0001   | 37 | 0.02   |      |       | acetyl-Coenzyme A acyltransferase 2                                    |
| 1422678_at   | Dgat2           | 0.50 | < 0.0001 | 39 | 0.008  |      |       | diacylglycerol O-acyltransferase 2                                     |
| 1417702_a_at | Hnmt            | 0.50 | < 0.0001 | 27 | 0.04   |      |       | histamine N-methyltransferase                                          |

## Online Figure VI

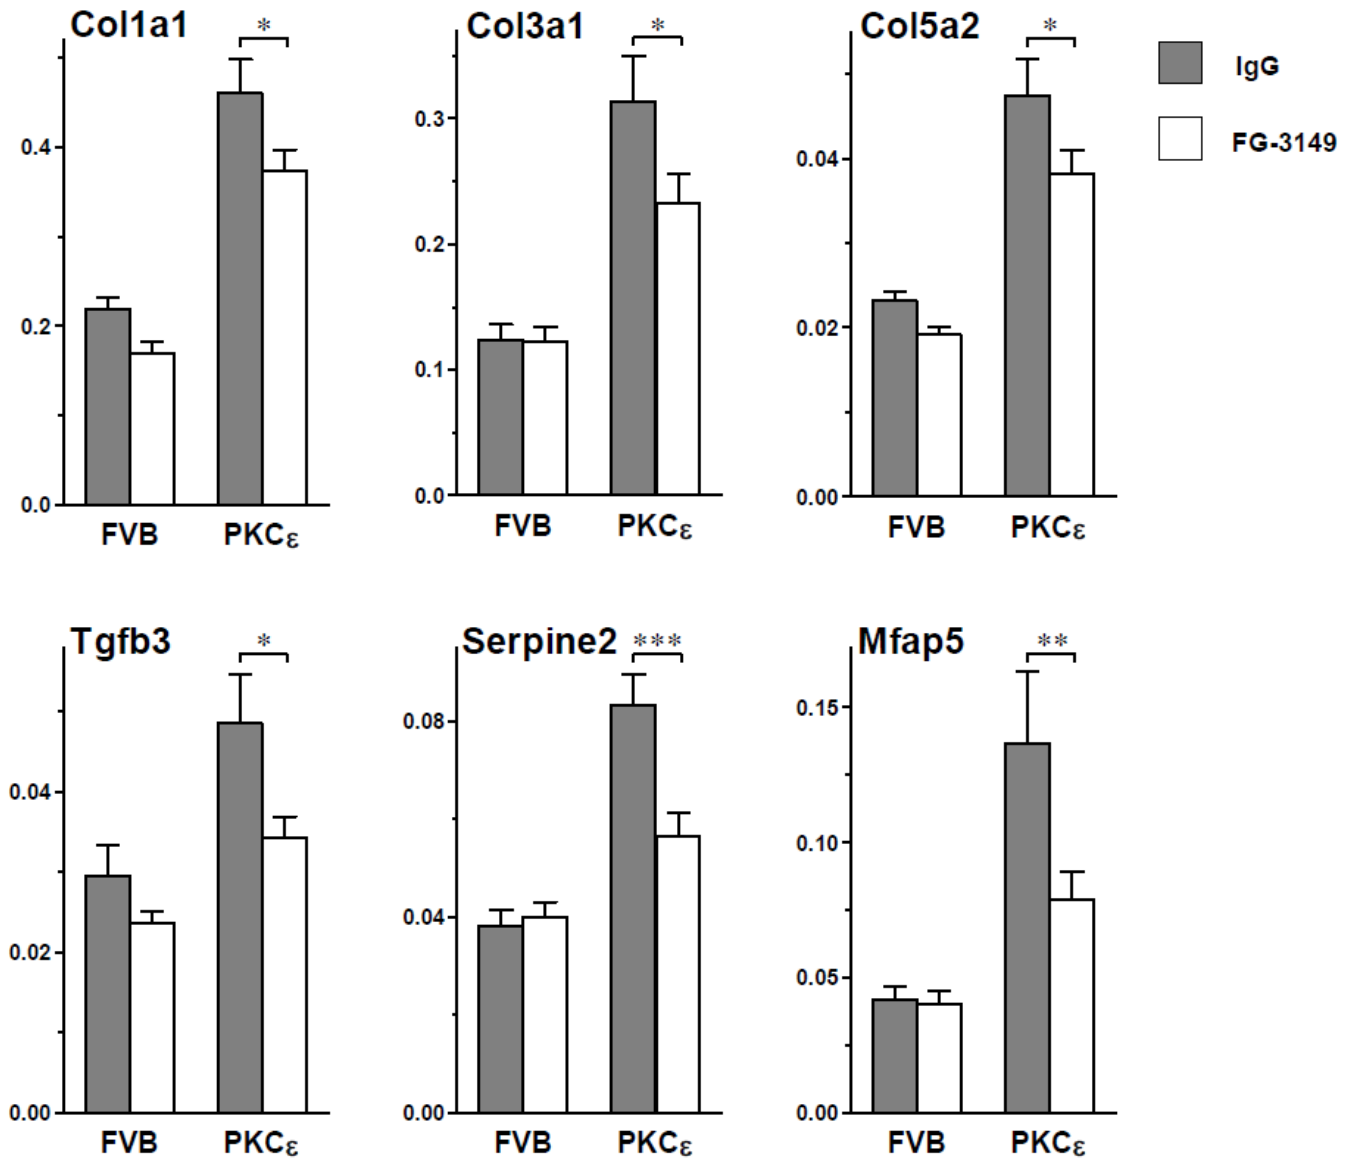

**Online Figure VI.** Validation of select ECM and ECM remodeling genes by qPCR. Grey and white bars indicate IgG and FG-3149 treatments, respectively. Actb-normalized expression (mean  $\pm$  SEM) was altered by genotype ( $P < 0.001$ ) and treatment ( $P < 0.05$ ) for all genes (2-way ANOVA). Bonferroni post-test  $P < 0.05$  (\*), 0.01 (\*\*), 0.001(\*\*\*)).

# Online Figure VII

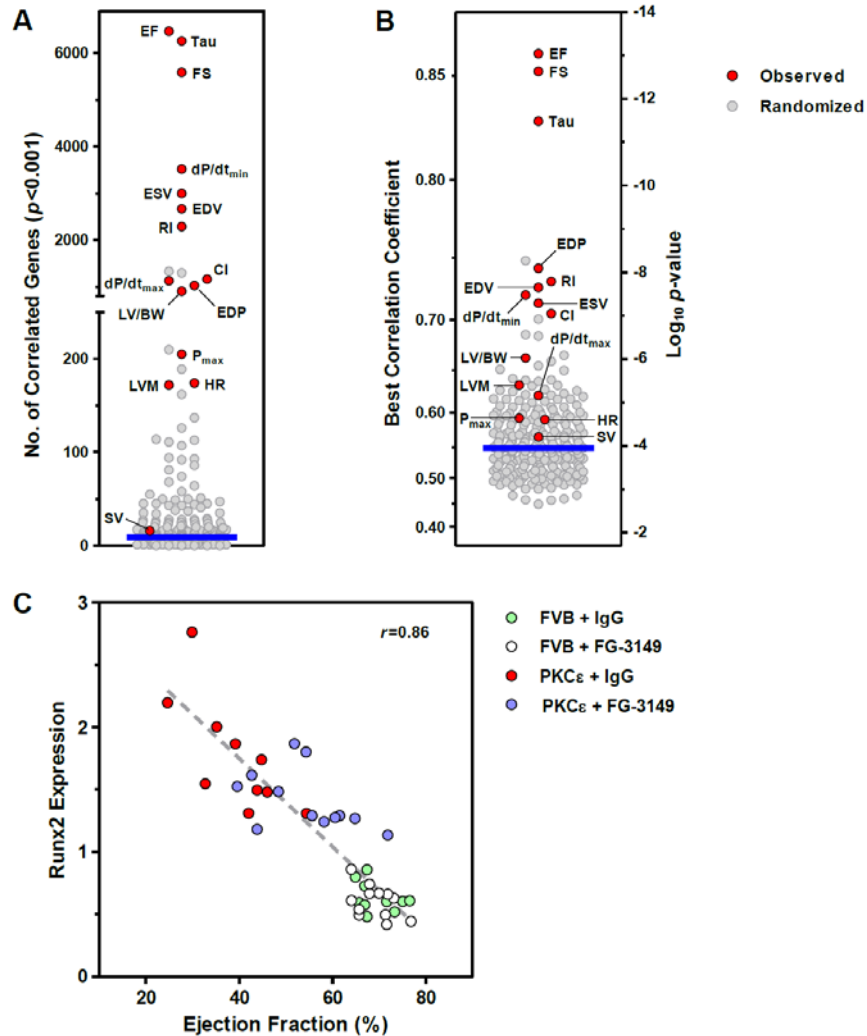

**Online Figure VII.** Stronger than expected associations between specific genes and FG-responsive cardiac function parameters. **A.** The number of genes correlated with cardiac parameters at  $P < 0.001$  (red circles) compared to the number of genes correlated with 250 randomized scenarios (grey circles). The median number of genes correlated after permutation analysis ( $n=9$ , blue bar) was far lower than that observed for key functional parameters (e.g., 6467 for EF). **B.** The best Pearson correlation coefficients ( $r$ , absolute value) and accompanying  $P$ -values for measured cardiac parameters (red circles) and 250 random simulations (grey circles). The median top correlation for the random scenarios ( $r=0.55$ ) was far lower than those observed for the cardiac parameters most highly affected by PKC $\epsilon$  and FG-3149 treatment. **C.** Median normalized expression of the gene (Runx2, runt-related transcription factor 2) most highly correlated with EF. EF, left ventricular (LV) ejection fraction; FS, LV fractional shortening; EDP, end-diastolic pressure; EDV, end-diastolic volume; ESV, end-systolic volume; CI, contractility index; RI, remodeling index; LVM, LV mass; LV/BW, LV-to-body weight ratio; P<sub>max</sub>, maximum systolic pressure; dP/dt<sub>max</sub>, maximum rate of LV pressure increase during the initiation of systole; dP/dt<sub>min</sub>, maximum rate of LV pressure decline during the initiation of diastole; HR, heart rate; SV, stroke volume.

**Online Table III. Proportional Representation of Human Cardiomyopathy Genes among FG-3149 Responsive Cardiac Injury Genes**

| Human Cardiomyopathy Dataset                                                                                  | (n, t, N, T)          | Fold Enrichment | p     | Concordant Genes                                                                                          |
|---------------------------------------------------------------------------------------------------------------|-----------------------|-----------------|-------|-----------------------------------------------------------------------------------------------------------|
| <b>FG-3149-responsive genes elevated in both PKC<math>\epsilon</math> hearts and human cardiomyopathies</b>   |                       |                 |       |                                                                                                           |
| Harvard Cardiogenomics (GSE1145)                                                                              | (20, 237, 214, 26305) | 8               | 7E-36 | <i>Col1a1, Col1a2, Dpysl3, Fbln2, Itgbl1 (4), Ltbp2 (2), Nppa, Postn (3), Ptn (3), Sfrp1, Thbs4, Tril</i> |
| Hannenhalli et al. 2006 (GSE5406)                                                                             | (7, 179, 22, 15685)   | 28              | 8E-32 | <i>Col1a1, Col1a2 (2), Col3a1 (2), Nppa, Ptn</i>                                                          |
| Barth et al. 2006 (GSE3585)                                                                                   | (7, 107, 31, 8391)    | 18              | 2E-21 | <i>Col1a1, Col1a2, Itgbl1, Ltbp2, Nppa, Postn, Serpine2</i>                                               |
| Kittleson et al. 2005 (GSE1869)                                                                               | (2, 179, 64, 15685)   | 3               | ns    | <i>Col3a1, Postn</i>                                                                                      |
| <b>FG-3149-responsive genes diminished in both PKC<math>\epsilon</math> hearts and human cardiomyopathies</b> |                       |                 |       |                                                                                                           |
| Harvard Cardiogenomics (GSE1145)                                                                              | (2, 118, 254, 26305)  | 2               | ns    | <i>Hopx, Myh6</i>                                                                                         |
| Hannenhalli et al. 2006 (GSE5406)                                                                             | (2, 61, 33, 15685)    | 16              | 4E-07 | <i>Hopx, Myh6</i>                                                                                         |
| Barth et al. 2006 (GSE3585)                                                                                   | (1, 34, 10, 8391)     | 25              | 5E-06 | <i>Myh6</i>                                                                                               |
| Kittleson et al. 2005 (GSE1869)                                                                               | (1, 61, 1, 15685)     | 257             | 1E-29 | <i>Myh6</i>                                                                                               |

Enrichment =  $(n/t)/(N/T)$ , where n = the number of FG-3149-responsive cardiac injury gene ortholog probesets similarly altered in the indicated human dataset ( $F_c > 2$ ,  $p < 0.05$  vs non-failing (NF) hearts), t = total FG-3149-responsive injury gene ortholog probesets for the indicated dataset, N = number of homologous probesets altered in the indicated human dataset ( $F_c > 2$ ,  $P < 0.05$ ), and T = total probesets in the indicated dataset homologous to those on the mouse MOE430A\_2.0 platform. Observed proportions of FG-3149-responsive cardiac injury genes similarly altered in the human cardiomyopathy datasets were compared to the proportions expected by chance using the  $\chi^2$  statistic. Concordant genes are those FG-3149-responsive genes that were similarly altered in both PKC $\epsilon$  hearts and human cardiomyopathy samples ( $F_c > 2$ ,  $P < 0.05$  each), where the number of probesets that met cut-offs in the human datasets are indicated in parentheses if greater than one. The human datasets contained data from 26 DCM, 32 ICM, 7 viral, 5 hypertrophic, 4 post-partum and 14 NF hearts (GSE1145), 108 DCM, 86 ICM and 16 NF hearts (GSE5406), 7 DCM and 5 NF hearts (GSE3585), and 21 DCM, 10 ICM and 6 NF hearts (GSE1869).
